# Supplementary material
Source: PubMed Central journal article supplement (PMC3896155)
Supplement: 1310750111_pnas.201310750SI.pdf [file 1310750111_pnas.201310750SI.pdf]

# Supporting Information

Fujimura et al. 10.1073/pnas.1310750111

## SI Materials and Methods

**House Dust Collection.** Dust from homes with or without dogs was collected using a sterile fabric filter sock inserted into a sterile vacuum nozzle immediately before vacuuming a 3' × 3' area for 3 min. The sock was removed from the vacuum, the collected dust weighed and sieved through a 300- $\mu$ m sieve to remove large debris from the sample. Comparable sieved samples have previously been used successfully to profile microbial communities present in house dust (1, 2). Dust samples were subsequently divided into 25- or 6.25-mg fractions for dog (D)- or no-pet (NP)-associated houses, respectively, each stored in a sterile 5-mL tube at  $-20^{\circ}\text{C}$  until used for murine supplementation.

**Murine Models. Cockroach allergen model.** BALB/c were purchased from The Jackson Laboratory. On the day of use, a single tube of dust was resuspended in sterile saline (1 mL) and immediately administered by oral gavage to animals (100- $\mu$ L supplementation per mouse); one group of control animals received sterile saline, the other, no supplement. This procedure ensured that animals received standardized (by weight) quantities of dust throughout the duration of the study and that dust samples were not impacted by recurrent freeze-thaw cycles. Supplementation was performed daily for 7 d before initial cockroach allergen extract (CRA) sensitization, and twice per week for the following 2 wk. CRA (Hollister-Stier) sensitization was performed as previously described (3). Briefly, 6- to 8-wk-old female mice were sensitized to CRA by three consecutive intratracheal instillations (5  $\mu$ g in 50  $\mu$ L) on days 0, 1, and 2. On days 14, 20, and 22, mice were locally challenged with CRA by intratracheal route, and mice were euthanized at day 23 (Fig. S1A).

For experiments examining whether inoculum level impacted airway immune responses, animals were supplemented with either 25 mg of D or NP dust [high dust exposure (HD)] or to 6.25 mg of D or NP dust [low dust exposure (LD)] daily as described above.

**OVA allergen model.** In this model, we again exposed BALB/c mice to dust from D- or NP-containing homes (or *Lactobacillus johnsonii*, see below) by oral gavage as described above. CD4 splenic T cells from DO.11 ovalbumin TCR-specific mice were purified by negative selection using CD4 T-Cell Isolation Kit (Miltenyi Biotec) according to the manufacturer's instructions. On day 14, naïve carboxyfluorescein succinimidyl ester (CFSE)-labeled splenic CD4<sup>+</sup> T cells isolated from DO.11 OVA peptide-specific T-cell receptor transgenic mice ( $1 \times 10^6$  cells-mouse<sup>-1</sup>; obtained from The Jackson Laboratory) were transferred via tail vein injection. One day after T-cell transfer, animals were challenged with whole ovalbumin protein (350  $\mu$ g) into the airway. Three days later, mice were killed, and lungs and lymph nodes were harvested (Fig. S1B).

**Respiratory syncytial virus infection.** Our laboratory uses antigenic subgroup A, line 19 respiratory syncytial virus (RSV), originally obtained from a sick infant at the University of Michigan. Infection with this RSV isolate for 8 d recapitulates several aspects of human infection including inflammatory responses, T-cell-mediated pathology, and airway mucus production upon intratracheal infection with  $1 \times 10^5$  pfu/mouse (4).

**Lung Histology.** The left lung was perfused with 4% (vol/vol) formaldehyde for fixation and embedded in paraffin. Five-micrometer lung sections were stained with periodic acid-Schiff and H&E to detect mucus production and inflammatory infiltrates,

respectively. Photomicrographs were captured using a Zeiss Axio Imager Z1 and AxioVision 4.8 software (Zeiss).

**mRNA Extraction, Reverse Transcription, and RT-PCR.** mRNA was isolated from ground lung tissue using TRIzol reagent (Invitrogen) or the RNeasy Mini kit (Qiagen) according to manufacturer's instructions. A total of 5  $\mu$ g of RNA per sample was reverse transcribed using murine leukemia virus RTase (Applied Biosystems). Expression of relevant genes was analyzed with TaqMan gene expression assays (Applied Biosystems) using an ABI Prism 7500 Sequence Detection System (Applied Biosystems). Gene expression was normalized to GAPDH and expressed as fold change over expression in control mice.

**Culture and Stimulation of Lymph Node Cells.** Mediastinal lymph nodes were digested mechanically, using 18-gauge needles, and enzymatically, via incubation with 1 mg/mL Collagenase A (Roche) and DNase I (Sigma-Aldrich) in RPMI 1640 with 10% FCS. Following red blood cell lysis, cells were passed through a 40- $\mu$ m strainer and counted with a Z2 Beckman Coulter particle counter. Suspensions of total lymph node cells were cultured in complete medium and restimulated with CRA for 48 h or with OVA (100  $\mu$ g-mL<sup>-1</sup>) for 96 h. Levels of T-helper cytokines, IL-4, IL-5, IL-13, IFN $\gamma$ , and IL-17 were determined in culture supernatants using a Bio-Plex assay (Bio-Rad). The remainder of the lymph node cells was analyzed using flow cytometry.

**Flow Cytometry.** Following FcR blocking, single-cell suspensions of BAL, lung, and lymph node cells were stained with anti-CD11c (N418), anti-Ly6C (HK1.4), anti-Ly6G (1A8; Biolegend), anti-CD11b (M1/70), anti-CD103 (2E7) (eBioscience), and anti-MHC-II/IAb (AF6-120.1; BD Biosciences). Inflammatory neutrophils were gated as low autofluorescent, CD11c<sup>lo</sup>CD11b<sup>hi</sup> Ly6C<sup>+</sup>Ly6G<sup>+</sup> with low forward scatter. Inflammatory monocytes were analyzed as low autofluorescent, CD11c<sup>lo</sup>CD11b<sup>hi</sup>Ly6C<sup>+</sup>Ly6G<sup>-</sup> cells with low forward scatter. CD11b<sup>+</sup> dendritic cells were defined as low autofluorescent, CD11c<sup>hi</sup>MHCII<sup>+</sup>CD11b<sup>hi</sup>CD103<sup>-</sup> cells; within this population, Ly6C<sup>+</sup> cells were considered to be inflammatory CD11b<sup>+</sup> DCs. CD103<sup>+</sup> dendritic cells were defined as low autofluorescent, CD11c<sup>hi</sup>MHCII<sup>+</sup>CD11b<sup>lo</sup>CD103<sup>+</sup> cells. Upon staining for surface markers with anti-CD3 (17A2), anti-CD4 (RM4-5), anti-CD8 Abs (16-10A1; Biolegend), and anti-CD69 Ab (H1.2F3; eBioscience), T cells were defined as CD3-positive cells with low forward and side scatter, and subdivided into CD4 or CD8 single-positive subpopulations, using CD69 expression as a marker of early activation.

**Cecal Microbiome Profiling.** Dust samples were extracted using a cetyltrimethylammonium bromide (CTAB)-polyethylene glycol (PEG) protocol as previously described (5). Briefly, 0.5 mL of modified CTAB extraction buffer [1:1 10% CTAB in 1 M NaCl to 0.5 M phosphate buffer (pH 7.5–8) in 1 M NaCl] were added to 0.2 g of dust (when available) in Lysing Matrix E tubes (MP Biomedicals), followed by 500  $\mu$ L of phenol:chloroform:isoamyl alcohol (25:24:1). Samples were bead-beaten using MPBio FastPrep-24 at 5.5 m/s for 30 s before centrifugation for 5 min at 16,000  $\times$  g at 4  $^{\circ}\text{C}$ . The supernatant was then transferred to heavy phase-lock gel 1.5-mL tubes (5Prime). One volume of chloroform was added to each sample and centrifuged for 5 min at 12,000  $\times$  g at 4  $^{\circ}\text{C}$ . An additional 0.5 mL of CTAB-modified extraction buffer was added to each lysing matrix tube to increase recovery of nucleic acid from each sample. One microliter of linear acrylamide was added to the extracted supernatant

followed by 2 vol of PEG. Following a 2-h incubation at room temperature, samples were washed with ice-cold 70% ethanol and resuspended in 30  $\mu\text{L}$  of molecular-grade  $\text{H}_2\text{O}$ . Extracted material was pooled for each sample before application to the DNA column of the Qiagen AllPrep DNA/RNA extraction kit, and DNA was extracted according to the manufacturer's instructions.

Cecal samples were harvested immediately after the animals were sacked, placed in RNAlater (Life Technologies), and stored for 24 h at 4  $^\circ\text{C}$ , before storage at  $-80^\circ\text{C}$  until processed for microbiome profiling. Frozen cecal samples were thawed on ice and transferred into individual Lysing Matrix E tubes (MP Biomedicals) containing 600  $\mu\text{L}$  of RLT<sup>+</sup> buffer (Qiagen). Samples were bead-beaten for 30 s at 5.5 m/s using MPBio FastPrep-24 (MP Biomedicals), centrifuged for 1 min at 2,000 rpm (Eppendorf 5424R microcentrifuge), and transferred to the AllPrep Kit (Qiagen) for DNA extraction following the manufacturer's protocol.

PCR reactions for PhyloChip analysis were performed in 25- $\mu\text{L}$  reactions using 0.02 U of Takara ExTaq (Takara Mirus Bio), 1 $\times$  Takara buffer with  $\text{MgCl}_2$ , 0.3  $\text{pmol}\cdot\mu\text{L}^{-1}$  of 27F and 1492R primer (Lane 1991), 0.8 mM dNTPs, 0.8  $\text{mg}\cdot\text{mL}^{-1}$  BSA (Roche Applied Science), and 30 ng of DNA template. A total of 12 reactions per sample were performed in an Eppendorf Mastercycler gradient thermocycler across a gradient (48–58.4  $^\circ\text{C}$ ) of annealing temperatures to maximize diversity recovered. Reaction conditions were as follows: initial denaturation (95  $^\circ\text{C}$  for 3 min) followed by 25 cycles of 95  $^\circ\text{C}$  (30 s), annealing (30 s), and extension at 72  $^\circ\text{C}$  (2 min), and a final extension of 72  $^\circ\text{C}$  (10 min). PCR amplification was verified using a 1% TBE agarose gel.

**PhyloChip Profiling.** Amplified 16S rRNA product was purified using the QIAquick Gel Extraction Kit (Qiagen) before being pooled, fragmented, and biotinylated. A total of 250 ng of labeled amplicon per sample containing quantitative standards (consisting of 14 non-16S rRNA genes that permit data normalization) was applied to each G2 PhyloChip (Affymetrix). Arrays were processed as previously described (2).

***L. johnsonii* Isolation and Identification.** Ceca from four mice gavage with D-associated house dust were extracted aseptically from animals. Cecal contents were removed under aseptic conditions, transferred into 500  $\mu\text{L}$  of sterile PBS, and vortexed vigorously for 1 min to resuspend. Suspensions were serially diluted 10-fold in sterile PBS, and  $10^{-2}$  to  $10^{-5}$  dilutions were plated on *Lactobacillus* selective de Man, Rogosa and Sharpe (MRS) agar (BD Biosciences). For each of the four cecal samples, six colonies were selected for further analysis from the lowest serial dilution that yielded individual colonies. Identity was determined by full-length bidirectional Sanger sequencing (University of California, San Francisco, Genomics Core Facility) of the 16S rRNA gene. Overlapping contigs for each clone were assembled in Codon Code Aligner (CodonCode Corporation), and the resulting 21 high-quality consensus sequences were interrogated using both BLAST (National Center for Biotechnology Information; <http://blast.ncbi.nlm.nih.gov/Blast.cgi>) and the 16S rRNA Greengenes database (6).

**Generation of *L. johnsonii* Supplements for Murine Studies.** To generate supplements with  $5 \times 10^7$  CFU per 100  $\mu\text{L}$ , 100 mL of MRS broth was inoculated with *L. johnsonii* from a glycerol stock before static overnight culture at 37  $^\circ\text{C}$ . Stationary-phase cells ( $\text{OD}_{600} = 0.89$ ) were centrifuged at 4,000 rpm (Eppendorf 5424R microcentrifuge) for 15 min at 4  $^\circ\text{C}$  and resuspended in 60 mL of a 50:50 (vol/vol) solution of MRS broth/50% glycerol. Cells were aliquoted into batches of 500  $\mu\text{L}$ , snap frozen in liquid nitrogen, and stored at  $-80^\circ\text{C}$  until they were used in murine studies. Viable cell count of the glycerol stock was determined to be  $2.7 \times 10^8$  CFU per vial. For murine supplementation studies,

tubes were defrosted on ice, centrifuged at 14,000 rpm (Eppendorf 5424R microcentrifuge) for 30 s at 4  $^\circ\text{C}$ , and washed twice in sterile saline to remove excess glycerol. The cells were then resuspended in 700  $\mu\text{L}$  of sterile saline. Each mouse received 100  $\mu\text{L}$  (equivalent to  $3.9 \times 10^7$  CFU) of resuspended *L. johnsonii*. The remaining suspension was plated on MRS media to confirm that viable *L. johnsonii* cell counts remained high and stable throughout the duration of the study.

**Validation of *L. johnsonii* Presence by Q-PCR.** Quantitative PCR (Q-PCR) was used to validate *L. johnsonii* relative abundance reported by the array using the QuantiTect SYBR Green PCR kit per the manufacturer's instructions (Qiagen) and the *L. johnsonii*-specific primer pair Lj1 and La2 (7). A total of 10 ng of DNA extracted from cecal samples per reaction was used in triplicate, 25- $\mu\text{L}$  Q-PCR reactions at an annealing temperature of 60  $^\circ\text{C}$ . Inverse cycle threshold values were plotted against array fluorescence intensity. Correlation using `cor.test` in R ([www.R-project.org](http://www.R-project.org)) was calculated to assess concordance between the two independent molecular methods.

**Statistical Analyses.** As an exploratory tool to examine community composition dissimilarity, nonmetric multidimensional scaling (NMDS) or principal coordinate analysis (PCoA) was performed, based on Canberra (8) or UniFrac (9) distance matrices, respectively. PhyloChip fluorescence intensities, normalized to quantitative standards were  $\log_2 \times 1,000$  transformed before analyses. Canberra distance matrix was generated in R ([www.R-project.org](http://www.R-project.org)). The stepacross dissimilarity between shared species (`noshare`) was set at 0.1, and the maximum number of random starts was set at 30 in the *vegan* package. NMDS was conducted using the default settings for metaMDS. PCoA was performed using a UniFrac distance matrix and `cmdscale` in *stats* and constructed using the *ade4* package (10). The percentage of variability explained by the two axes was calculated by dividing the eigenvalue for each axis by the sum of all positive eigenvalues.

Community richness was determined in a two-stage process where probe sets were scored ( $r$ ) by the potential of the probe pair to respond to the target and not to the background; for each  $r$  score, a minimum of 18 probe pairs were considered (11). For an operational taxonomic unit (OTU) to be considered present, the  $r$  score was required to pass the following three thresholds:  $rQ_1 \geq 0.379$ ,  $rQ_2 \geq 0.565$ , and  $rQ_3 \geq 0.82$ . OTUs that passed this first stage of data filtration were then considered for stage 2, where  $r_{\text{subx}} \geq 0.5$  (11). Pielou's evenness was calculated using the *vegan* package, and Faith's phylogenetic diversity was determined using the *picante* package. Kruskal–Wallis, nonparametric ANOVA, in *stats* was used to test whether significant differences existed between treatment groups. Student's, Wilcoxon, or Welch's  $t$  test was used to determine significant differences between pairs of treatment groups as appropriate.  $Q$ -value false-discovery rates were calculated as previously described (12) when multiple comparisons were made. Values of  $P$  and  $q > 0.05$  and 0.15, respectively, were considered significant. Phylogenetic trees were constructed in iTOL (13, 14).

**In Silico Metagenome Prediction.** PICRUSt (Phylogenetics Investigation of Communities by Reconstruction of Unobserved States), a bioinformatics software used to predict functional metagenomes from a marker gene survey (such as 16S rRNA gene) (<http://picrust.github.com/picrust/>), was used to generate in silico metagenomes for data generated in this study. First, 16S rRNA sequences were obtained for OTUs significantly enriched in the cecal microbiota of D-associated house dust- and *L. johnsonii*-supplemented animals (compared with respective control animals) by PhyloChip from the GreenGenes database ([http://greengenes.secondgenome.com/downloads/database/13\\_5](http://greengenes.secondgenome.com/downloads/database/13_5)) using a custom script written in Python. Retrieved 16S rRNA sequences were

imported into QIIME to generate an OTU table, through a closed-referenced OTU-picking protocol. This OTU table was then subjected to PICRUSt analysis and grouped into corresponding KEGG pathways using the KEGG database ([www.genome.jp/kegg/pathway.html](http://www.genome.jp/kegg/pathway.html)). Comparisons between D dust- or *L. johnsonii*-supplemented animals and their relative con-

trols were visualized using a heat map constructed using a custom script written in R, to indicate, based on presence-absence data, the KEGG pathways enriched in each respective group. The custom pipeline developed to analyze and visualize this data are open source and available at GitHub (<https://github.com/alifar76/PHoP>).

1. Fujimura KE, et al. (2012) Development of a standardized approach for environmental microbiota investigations related to asthma development in children. *J Microbiol Methods* 91(2):231–239.
2. Fujimura KE, et al. (2010) Man's best friend? The effect of pet ownership on house dust microbial communities. *J Allergy Clin Immunol* 126(2), 410–412, 412.e1–3.
3. Berlin AA, Hogaboam CM, Lukacs NW (2006) Inhibition of SCF attenuates peribronchial remodeling in chronic cockroach allergen-induced asthma. *Lab Invest* 86(6):557–565.
4. Demoor T, et al. (2012) IPS-1 signaling has a nonredundant role in mediating antiviral responses and the clearance of respiratory syncytial virus. *J Immunol* 189(12):5942–5953.
5. DeAngelis KM, et al. (2009) Selective progressive response of soil microbial community to wild oat roots. *ISME J* 3(2):168–178.
6. DeSantis TZ, et al. (2006) Greengenes, a chimera-checked 16S rRNA gene database and workbench compatible with ARB. *Appl Environ Microbiol* 72(7):5069–5072.
7. Furet JP, Qu  n  e P, Tailliez P (2004) Molecular quantification of lactic acid bacteria in fermented milk products using real-time quantitative PCR. *Int J Food Microbiol* 97(2): 197–207.
8. Lance GN, Williams WT (1967) Mixed-data classificatory programs, I.) Agglomerative systems. *Aust Comput J* 1(1):15–20.
9. Hamady M, Lozupone C, Knight R (2010) Fast UniFrac: Facilitating high-throughput phylogenetic analyses of microbial communities including analysis of pyrosequencing and PhyloChip data. *ISME J* 4(1):17–27.
10. Dray S, Dufour AB (2007) The ade4 package: Implementing the duality diagram for ecologists. *J Stat Softw* 22(4):1–20.
11. Hazen TC, et al. (2010) Deep-sea oil plume enriches indigenous oil-degrading bacteria. *Science* 330(6001):204–208.
12. Storey JD, Tibshirani R (2003) Statistical significance for genomewide studies. *Proc Natl Acad Sci USA* 100(16):9440–9445.
13. Letunic I, Bork P (2007) Interactive Tree Of Life (iTOL): An online tool for phylogenetic tree display and annotation. *Bioinformatics* 23(1):127–128.
14. Letunic I, Bork P (2011) Interactive Tree Of Life v2: Online annotation and display of phylogenetic trees made easy. *Nucleic Acids Res* 39(Web Server issue):W475–W478.

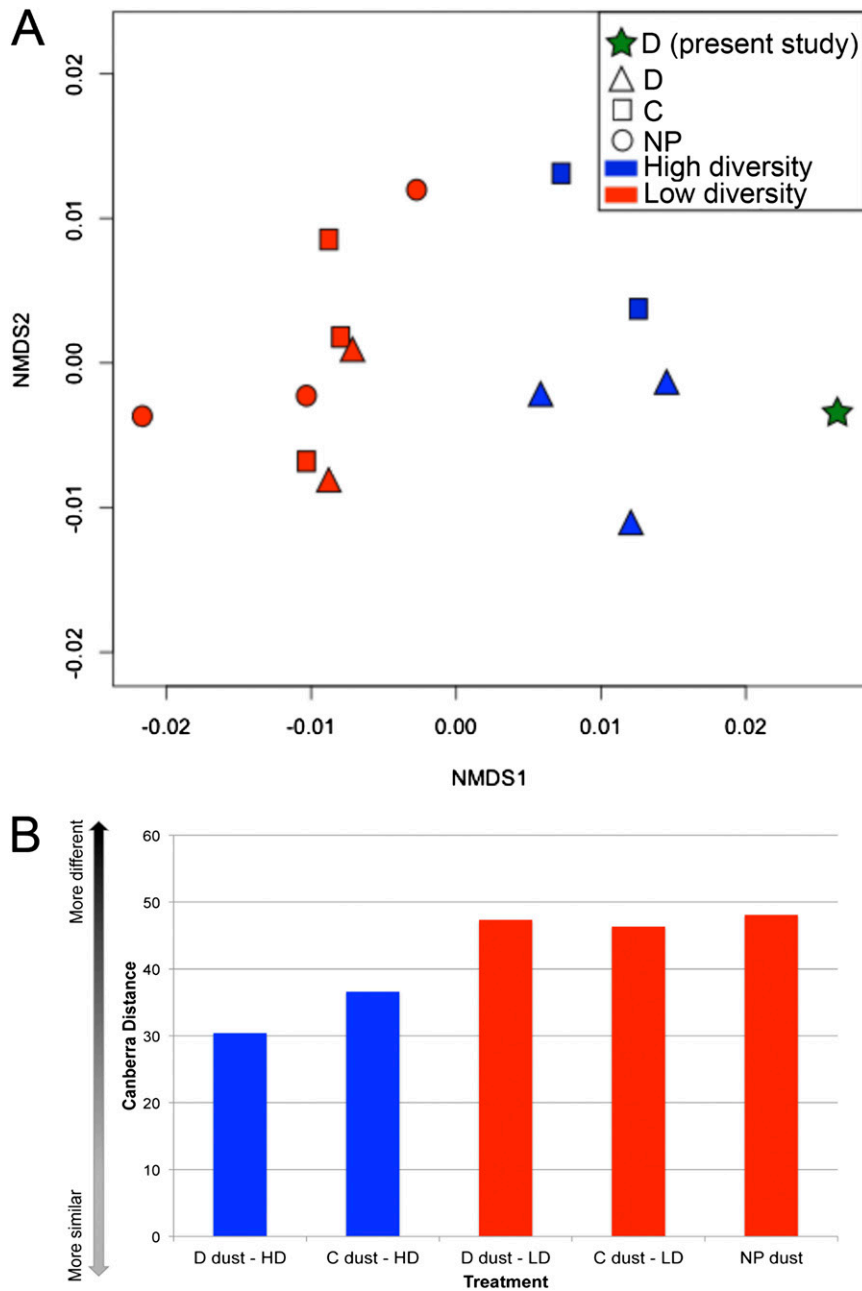

**Fig. S1.** (A) Dog (D)-associated house dust used for this study is compositionally more similar to other D-associated house dust samples. NMDS ordination reveals that the D-associated house dust used in this study exhibits greatest compositional similarity to other high diversity pet-associated house dust samples profiled in a previous study using the same platform. C, cat; D, dog; NP, no pet. (B) Calculated Canberra distances between the D dust sample used in this study and other samples previously profiled under identical conditions confirm that it is most similar to other high-diversity D dust samples (C, cat; D, dog; HD, high diversity; LD, low diversity; NP, no pet).

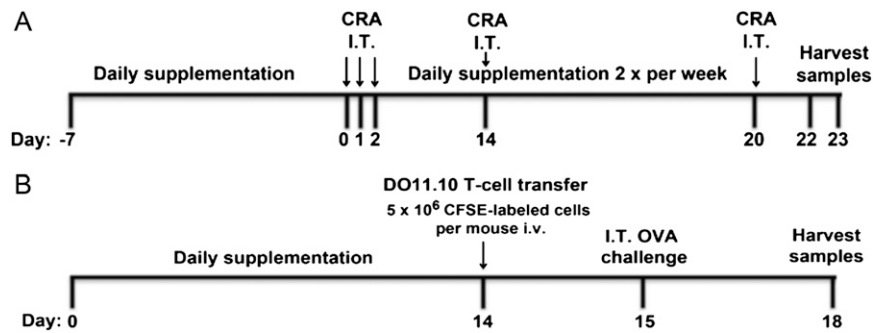

**Fig. S2.** Experimental design of murine models used in this study. (A) Cockroach allergen (CRA) airway challenge model involved daily oral gavage of mice ( $n = 5$  per group) with D, NP dust suspension or saline before CRA sensitization via intratracheal administration. Animals in the control treatment group received no interventions. Following the initial CRA sensitization on day 7, animals continued to receive the relevant supplementation by oral gavage twice per week. During this period, mice were challenged on days 14, 20, and 22 with CRA, before the end of the protocol (EP) on day 23. (B) DO11.10 T-cell transfer OVA model was performed in a similar manner in that animals ( $n = 5$  per group) received daily supplementation with D, NP dust suspension or saline for 14 d before transfer of naïve T cells and subsequent intratracheal OVA challenge on day 15. Animals were taken at the end of the protocol (EP) on day 18. Control animals received no treatment.

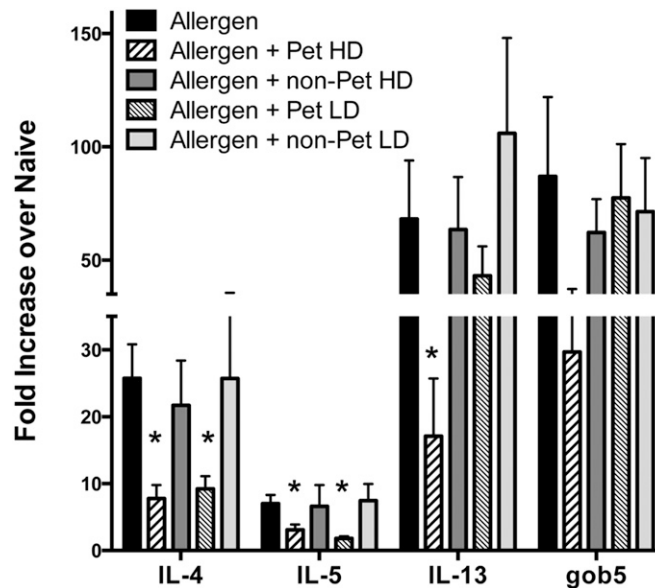

**Fig. S3.** Allergen-responsive phenotype is sustained despite normalization of house dust exposures. Animals were exposed to either equivalent high dose (HD) (25 mg) or low dose (LD) (6.25 mg) of dog- (D) or no-pet (NP)-associated house dust as described in *SI Materials and Methods*. Airway Th2 cytokine and *gob5* gene expression was quantified for each group. Reduced exposure to D-associated house dust still resulted in significant reductions in Th2 cytokine expression in the airways, although the reduction in *gob5* gene expression observed upon high level exposure to D dust, was lost upon reduced exposure. Increased exposure to NP-associated house dust did not result in reduced Th2 cytokine or *gob5* responses in murine airways.

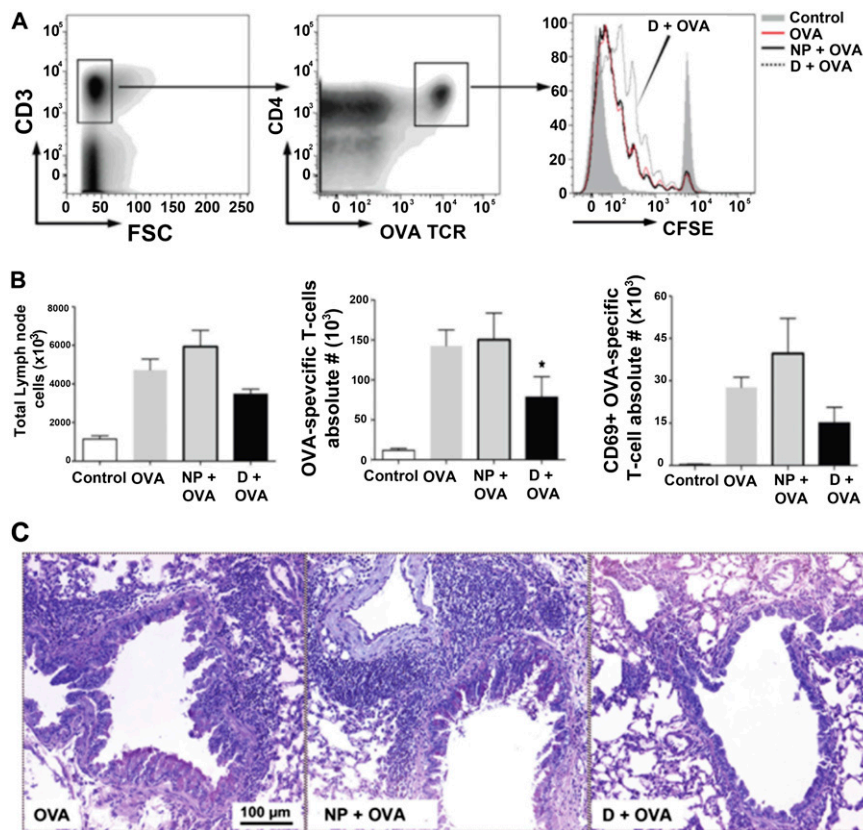

**Fig. S4.** Supplementation of dust from homes with dogs reduces antigen-specific T-cell expansion and pulmonary inflammation in a primary immune response. Using naïve DO.11 ovalbumin-specific transgenic TCR T-cell transfer into dust-supplemented and ovalbumin airway-challenged mice, studies examined the role of the effects of dust on initiation of the immune response. (A) CFSE-labeled T cells from DO.11 mice were tracked for their expansion using classic dilution of CFSE as a measure of proliferation and demonstrated a reduction in CFSE dilution in the D dust-supplemented mice. (B) Enumeration of total lymph nodes cells (*Left*), ovalbumin TCR-specific T cells (*Center*), and CD69<sup>+</sup> activated ovalbumin-specific TCR-specific T cells (*Right*) were all reduced in only the D dust-supplemented animals; \* indicates  $P < 0.05$ . (C) The histologic examination of the peribronchial inflammation confirmed that D dust-supplemented animals displayed a significant reduction in the primary ovalbumin specific responses. Data represent the mean  $\pm$  SE from five mice per group.



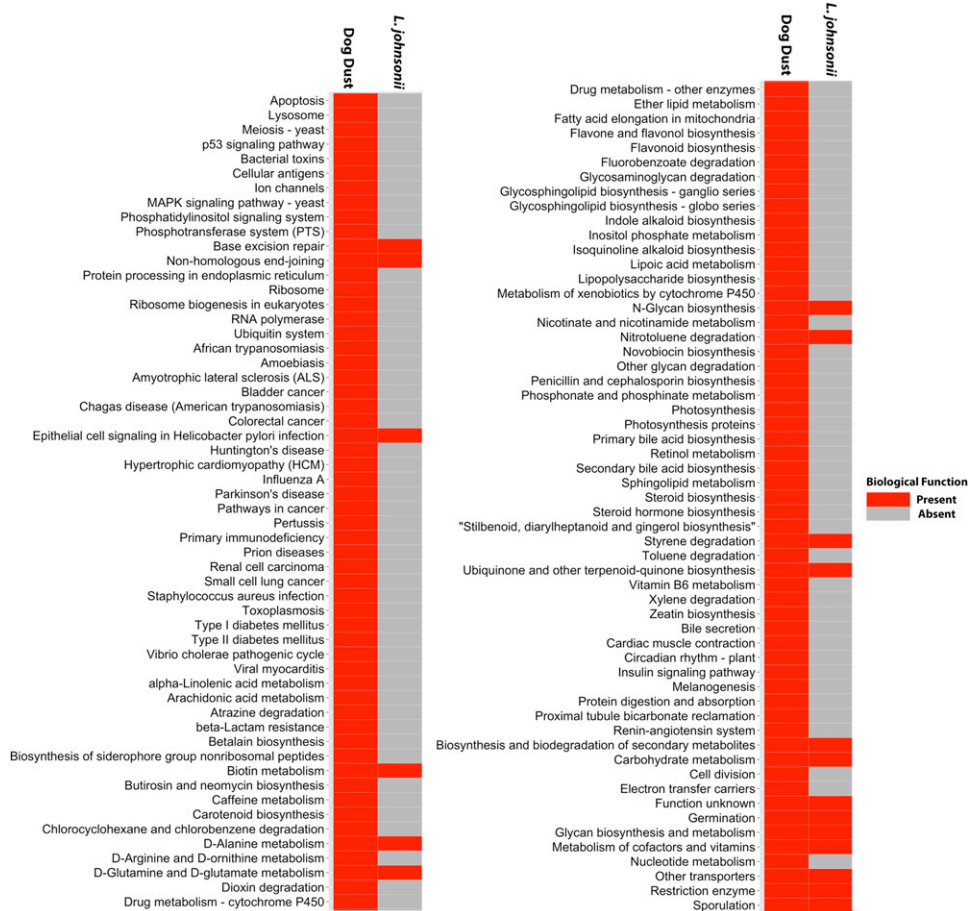

**Fig. S7.** D dust-exposed animals exhibit a broader range of predicted community function compared with *L. johnsonii*-supplemented animals. Heat map visualization of PICRUSt-predicted community metagenomes of D dust- and *L. johnsonii*-supplemented animals compared with respective controls. D dust-supplemented animals exhibit enrichment of an increased number of KEGG pathways compared with animals who received *L. johnsonii*. Common pathways enriched in both treatment groups include N-glycan biosynthesis and secondary metabolism pathways, implicating these and other shared KEGG pathways in the airway protective phenomenon observed across both treatment groups.



**Table S1. Taxa significantly enriched in D-associated house dust-supplemented animals compared with control mice**

| Phylum                                       | Family              | Taxon ID | Representative species                      | Relative enrichment (FI) | P value  | q value  |
|----------------------------------------------|---------------------|----------|---------------------------------------------|--------------------------|----------|----------|
| Taxa enriched in D dust-supplemented animals |                     |          |                                             |                          |          |          |
| Firmicutes                                   | Lachnospiraceae     | 11084    | Equine manure clone                         | 5,165.57                 | 3.40E-04 | 3.07E-02 |
| Firmicutes                                   | Peptococcaceae      | 4663     | <i>Desulfosporosinus meridiei</i>           | 4,049.61                 | 3.85E-02 | 1.38E-01 |
| Firmicutes                                   | Bacillaceae         | 5973     | <i>Bacillus circulans</i>                   | 3,141.76                 | 1.82E-03 | 5.94E-02 |
| Firmicutes                                   | Lactobacillaceae    | 7028     | <i>Lactobacillus gasseri (L. johnsonii)</i> | 2,734.05                 | 4.54E-02 | 1.44E-01 |
| Proteobacteria                               | Pasteurellaceae     | 3343     | <i>Actinobacillus rossii</i>                | 2,605.00                 | 3.93E-02 | 1.39E-01 |
| Firmicutes                                   | Lachnospiraceae     | 11092    | mpn-isolate group                           | 2,378.85                 | 4.23E-02 | 1.40E-01 |
| Firmicutes                                   | Lachnospiraceae     | 10380    | <i>Dorea longicatena</i>                    | 2,252.60                 | 1.52E-02 | 9.81E-02 |
| Firmicutes                                   | Ruminococcaceae     | 10132    | Rumen clone                                 | 2,217.02                 | 2.42E-03 | 5.94E-02 |
| Firmicutes                                   | Clostridiaceae      | 9826     | <i>Clostridium uliginosum</i>               | 2,159.64                 | 9.51E-03 | 7.75E-02 |
| Firmicutes                                   | Paenibacillaceae    | 7001     | <i>Paenibacillus sp.</i>                    | 2,139.13                 | 2.45E-03 | 5.94E-02 |
| BRC1                                         | Unclassified        | 1366     | Penguin droppings clone                     | 2,027.62                 | 1.24E-02 | 8.62E-02 |
| Firmicutes                                   | Lactobacillaceae    | 5507     | <i>Lactobacillus gallinarum</i>             | 1,920.70                 | 1.75E-02 | 1.01E-01 |
| Cyanobacteria                                | Unclassified        | 8314     | Microbial mat                               | 1,818.16                 | 6.04E-03 | 7.10E-02 |
| Firmicutes                                   | Lachnospiraceae     | 10118    | Rumen clone                                 | 1,784.85                 | 4.38E-02 | 1.43E-01 |
| Unclassified                                 | Unclassified        | 1954     | <i>Thermodesulfobium narugense</i>          | 1,737.58                 | 2.16E-03 | 5.94E-02 |
| Firmicutes                                   | Lactobacillaceae    | 6107     | <i>Lactobacillus ferintoshensis</i>         | 1,652.91                 | 4.42E-02 | 1.43E-01 |
| Acidobacteria                                | Acidobacteriaceae   | 8372     | PCB-polluted soil clone                     | 1,588.71                 | 4.34E-03 | 6.63E-02 |
| Firmicutes                                   | Lachnospiraceae     | 10371    | Vaginal lavage                              | 1,584.88                 | 1.87E-02 | 1.01E-01 |
| Firmicutes                                   | Lachnospiraceae     | 9918     | Gulf Mexico clone                           | 1,576.20                 | 8.35E-03 | 7.43E-02 |
| Firmicutes                                   | Leuconostocaceae    | 5813     | <i>Weissella cibaria</i>                    | 1,573.64                 | 2.80E-03 | 6.12E-02 |
| Firmicutes                                   | Bacillaceae         | 5842     | <i>Streptococcus pyogenes</i>               | 1,563.35                 | 1.14E-02 | 8.19E-02 |
| WPS-2                                        | Unclassified        | 2625     | Volcanic deposit clone                      | 1,559.73                 | 2.95E-03 | 6.12E-02 |
| Firmicutes                                   | Lactobacillaceae    | 6524     | <i>Lactobacillus kitasatonis</i>            | 1,558.53                 | 4.13E-02 | 1.39E-01 |
| Bacteroidetes                                | Rikenellaceae       | 7504     | Cow rumen clone                             | 1,539.98                 | 2.01E-02 | 1.01E-01 |
| Proteobacteria                               | Desulfobacteraceae  | 8147     | Hypersaline lake clone                      | 1,519.96                 | 6.15E-03 | 7.10E-02 |
| Firmicutes                                   | Lactobacillaceae    | 5839     | <i>Lactobacillus antri</i>                  | 1,495.99                 | 2.46E-02 | 1.07E-01 |
| Proteobacteria                               | Vibrionaceae        | 2494     | <i>Vibrio logei</i>                         | 1,488.82                 | 4.49E-02 | 1.44E-01 |
| Firmicutes                                   | Bacillaceae         | 6379     | <i>Bacillus cereus</i>                      | 1,487.01                 | 4.50E-02 | 1.44E-01 |
| Firmicutes                                   | Clostridiaceae      | 10661    | <i>Clostridium josui</i>                    | 1,482.40                 | 2.09E-02 | 1.01E-01 |
| Firmicutes                                   | Lachnospiraceae     | 11041    | Biodegraded Canadian oil reservoir clone    | 1,456.64                 | 1.96E-02 | 1.01E-01 |
| Proteobacteria                               | Rhodospirillaceae   | 7752     | Deep sea sediment clone                     | 1,369.28                 | 5.07E-03 | 7.10E-02 |
| Spirochaetes                                 | Spirochaetaceae     | 6229     | <i>Spirochaeta taiwanensis</i>              | 1,349.26                 | 3.21E-02 | 1.24E-01 |
| Proteobacteria                               | Caulobacteraceae    | 8887     | <i>Brevundimonas diminuta</i>               | 1,316.16                 | 1.70E-02 | 1.01E-01 |
| Actinobacteria                               | Micromonosporaceae  | 1539     | <i>Micromonospora eburnea</i>               | 1,295.54                 | 7.90E-03 | 7.43E-02 |
| Firmicutes                                   | Paenibacillaceae    | 5820     | <i>Bacillus sp.</i>                         | 1,272.28                 | 3.00E-03 | 6.12E-02 |
| Actinobacteria                               | Microbacteriaceae   | 1458     | Freshwater clone                            | 1,264.87                 | 2.30E-02 | 1.04E-01 |
| Firmicutes                                   | Ruminococcaceae     | 9896     | Herbivore gastrointestinal tract clone      | 1,235.24                 | 1.62E-02 | 9.92E-02 |
| Firmicutes                                   | Lachnospiraceae     | 9691     | <i>Ruminococcus sp.</i>                     | 1,140.28                 | 1.76E-02 | 1.01E-01 |
| Cyanobacteria                                | Pseudanabaenaceae   | 8597     | <i>Synechococcus sp.</i>                    | 1,055.75                 | 3.05E-02 | 1.22E-01 |
| Proteobacteria                               | Thiotrichaceae      | 4886     | Marine sediment clone                       | 1,052.44                 | 2.35E-02 | 1.04E-01 |
| Acidobacteria                                | Acidobacteriaceae   | 5485     | Uranium mining tailing clone                | 1,050.05                 | 8.89E-03 | 7.58E-02 |
| Proteobacteria                               | Phyllobacteriaceae  | 7632     | Cultivating Sargasso clone                  | 1,017.70                 | 2.18E-02 | 1.03E-01 |
| Acidobacteria                                | Solibacteraceae     | 5527     | Water 10 m downstream clone                 | 994.26                   | 7.27E-03 | 7.26E-02 |
| Proteobacteria                               | Chromatiaceae       | 3880     | Mid-Atlantic Ridge clone                    | 991.00                   | 3.60E-02 | 1.36E-01 |
| Firmicutes                                   | Lactobacillaceae    | 6923     | <i>Lactobacillus vaginalis</i>              | 967.24                   | 6.66E-04 | 3.07E-02 |
| Firmicutes                                   | Bacillaceae         | 5594     | <i>Bacillus megaterium</i>                  | 963.27                   | 6.46E-03 | 7.10E-02 |
| Proteobacteria                               | Rhodospirillaceae   | 8788     | <i>Tistrella mobilis</i>                    | 928.57                   | 6.49E-03 | 7.10E-02 |
| Actinobacteria                               | Micromonosporaceae  | 1337     | <i>Micromonospora fulviviridis</i>          | 911.10                   | 4.07E-02 | 1.39E-01 |
| Actinobacteria                               | Micromonosporaceae  | 1030     | <i>Micromonospora chaiyaphumensis</i>       | 905.11                   | 1.90E-02 | 1.01E-01 |
| Proteobacteria                               | Piscirickettsiaceae | 2759     | <i>Piscirickettsia salmonis</i>             | 904.38                   | 2.13E-02 | 1.02E-01 |
| Firmicutes                                   | Bacillaceae         | 6292     | <i>Bacillus pallidus</i>                    | 871.75                   | 8.39E-03 | 7.43E-02 |
| Deferribacteres                              | Calithrixaceae      | 4360     | <i>Caldithrix abyssi</i>                    | 781.45                   | 4.24E-03 | 6.63E-02 |
| Firmicutes                                   | Ruminococcaceae     | 10838    | <i>Acetanaerobacterium elongatum</i>        | 736.62                   | 5.58E-03 | 7.10E-02 |
| Proteobacteria                               | Xanthomonadaceae    | 4650     | <i>Xylella fastidiosa</i>                   | 734.34                   | 2.98E-02 | 1.20E-01 |
| Acidobacteria                                | Acidobacteriaceae   | 6679     | Uranium mining trailing clone               | 686.77                   | 3.73E-02 | 1.38E-01 |
| Proteobacteria                               | Pseudomonadaceae    | 2887     | <i>Pseudomonas fluorescens</i>              | 682.23                   | 3.83E-02 | 1.38E-01 |
| Firmicutes                                   | Paenibacillaceae    | 7035     | Hot Springs clone                           | 677.25                   | 1.30E-02 | 8.95E-02 |
| Actinobacteria                               | Micromonosporaceae  | 399      | <i>Micromonospora chersinia</i>             | 670.20                   | 2.41E-02 | 1.06E-01 |
| Firmicutes                                   | Paenibacillaceae    | 5566     | <i>Paenibacillus sp.</i>                    | 639.02                   | 4.44E-04 | 3.07E-02 |
| Actinobacteria                               | Micromonosporaceae  | 1285     | <i>Micromonospora sp.</i>                   | 605.18                   | 1.13E-02 | 8.19E-02 |
| Chloroflexi                                  | Chloroflexaceae     | 9502     | Forest soil clone                           | 599.26                   | 3.08E-02 | 1.22E-01 |

Table S1. Cont.

| Phylum         | Family              | Taxon ID | Representative species                | Relative enrichment (FI) | P value  | q value  |
|----------------|---------------------|----------|---------------------------------------|--------------------------|----------|----------|
| Bacteroidetes  | Flexibacteraceae    | 2854     | <i>Flexibacter flexilis</i>           | 589.79                   | 1.53E-02 | 9.81E-02 |
| Actinobacteria | Cellulomonadaceae   | 1309     | Lichen-dominated Antarctic            | 562.47                   | 1.06E-02 | 7.96E-02 |
| Firmicutes     | Bacillaceae         | 6870     | <i>Bacillus megaterium</i>            | 525.29                   | 2.83E-02 | 1.16E-01 |
| Proteobacteria | Thiotrichaceae      | 3753     | Indian Ocean clone                    | 516.71                   | 9.92E-03 | 7.75E-02 |
| Firmicutes     | Bacillaceae         | 5400     | <i>Bacillus niacini</i>               | 504.09                   | 1.87E-02 | 1.01E-01 |
| Firmicutes     | Bacillaceae         | 7076     | <i>Bacillus smithii</i>               | 496.67                   | 2.95E-05 | 1.36E-02 |
| Actinobacteria | Micromonosporaceae  | 806      | <i>Micromonospora inositol</i>        | 482.10                   | 1.62E-03 | 5.94E-02 |
| Proteobacteria | Bradyrhizobiaceae   | 9747     | <i>Oligotropha carboxidovorans</i>    | 439.67                   | 3.15E-02 | 1.24E-01 |
| Proteobacteria | Sinobacteraceae     | 3726     | Soil near uranium tailings clone      | 331.33                   | 2.35E-02 | 1.04E-01 |
| Actinobacteria | Microbacteriaceae   | 802      | <i>Microbacterium phyllosphaerae</i>  | 316.66                   | 2.52E-02 | 1.07E-01 |
| Actinobacteria | Microbacteriaceae   | 214      | <i>Microbacterium liquefaciens</i>    | 315.32                   | 3.49E-02 | 1.33E-01 |
| Actinobacteria | Micromonosporaceae  | 1543     | <i>Micromonospora purpurea</i>        | 313.28                   | 1.04E-02 | 7.96E-02 |
| Firmicutes     | Bacillaceae         | 6208     | <i>Geobacillus stearothermophilus</i> | 311.48                   | 6.47E-04 | 3.07E-02 |
| Actinobacteria | Micromonosporaceae  | 1260     | <i>Micromonospora echinospora</i>     | 308.37                   | 4.09E-02 | 1.39E-01 |
| Actinobacteria | Micromonosporaceae  | 748      | <i>Micromonospora</i> sp.             | 283.75                   | 4.25E-02 | 1.40E-01 |
| Firmicutes     | Bacillaceae         | 5512     | <i>Bacillus aquimaris</i>             | 250.50                   | 9.77E-03 | 7.75E-02 |
| Firmicutes     | Unclassified        | 4632     | Thermophilic anaerobic clone          | 235.27                   | 4.46E-03 | 6.63E-02 |
| Proteobacteria | Burkholderiaceae    | 5314     | <i>Burkholderia glathei</i>           | 208.57                   | 2.00E-02 | 1.01E-01 |
| Actinobacteria | Microbacteriaceae   | 269      | <i>Agromyces neoliticus</i>           | 180.09                   | 2.20E-02 | 1.03E-01 |
| Actinobacteria | Nocardiaceae        | 1751     | <i>Skermania piniformis</i>           | 130.48                   | 1.47E-02 | 9.81E-02 |
| Proteobacteria | Pseudomonadaceae    | 1984     | <i>Pseudomonas alcaligenes</i>        | 125.54                   | 3.73E-03 | 6.14E-02 |
| Firmicutes     | Enterococcaceae     | 6242     | <i>Enterococcus faecium</i>           | 116.93                   | 2.21E-03 | 5.94E-02 |
| Proteobacteria | Halomonadaceae      | 2997     | <i>Halomonas alimentaria</i>          | 111.57                   | 5.88E-03 | 7.10E-02 |
| Proteobacteria | Bradyrhizobiaceae   | 9305     | <i>Afipia massiliensis</i>            | 105.59                   | 2.07E-03 | 5.94E-02 |
| Proteobacteria | Pseudomonadaceae    | 2786     | <i>Pseudomonas alcaligenes</i>        | 97.97                    | 1.77E-02 | 1.01E-01 |
| Actinobacteria | Frankiaceae         | 186      | <i>Frankia</i> sp                     | 91.19                    | 2.08E-02 | 1.01E-01 |
| Proteobacteria | Halomonadaceae      | 2007     | <i>Halomonas salina</i>               | 82.71                    | 8.32E-03 | 7.43E-02 |
| Proteobacteria | Pseudomonadaceae    | 2779     | <i>Pseudomonas japonica</i>           | 77.36                    | 3.22E-02 | 1.24E-01 |
| Proteobacteria | Comamonadaceae      | 5250     | Hindgut homogenate larva clone        | 73.52                    | 1.65E-02 | 1.00E-01 |
| Proteobacteria | Xanthomonadaceae    | 4257     | <i>Stenotrophomonas maltophilia</i>   | 71.05                    | 9.93E-03 | 7.75E-02 |
| Firmicutes     | Bacillaceae         | 5425     | <i>Geobacillus stearothermophilus</i> | 68.79                    | 2.53E-02 | 1.07E-01 |
| Actinobacteria | Streptomycetaceae   | 476      | <i>Streptomyces griseoruber</i>       | 63.97                    | 5.81E-03 | 7.10E-02 |
| Actinobacteria | Micromonosporaceae  | 216      | <i>Micromonospora echinospora</i>     | 61.97                    | 7.41E-03 | 7.26E-02 |
| Actinobacteria | Micromonosporaceae  | 1797     | <i>Micromonospora</i> sp.             | 56.34                    | 8.87E-03 | 7.58E-02 |
| Actinobacteria | Cellulomonadaceae   | 1559     | Lichen-dominated Antarctic clone      | 56.20                    | 2.03E-02 | 1.01E-01 |
| Proteobacteria | Burkholderiaceae    | 4718     | <i>Burkholderia pseudomallei</i>      | 43.41                    | 5.99E-03 | 7.10E-02 |
| Actinobacteria | Nocardioidaceae     | 1515     | <i>Nocardioides oleovorans</i>        | 40.81                    | 3.59E-03 | 6.12E-02 |
| Firmicutes     | Bacillaceae         | 6139     | <i>Bacillus amyloliquefaciens</i>     | 38.91                    | 1.23E-02 | 8.62E-02 |
| Proteobacteria | Methylobacteriaceae | 10767    | <i>Methylobacterium organophilum</i>  | 31.03                    | 3.35E-03 | 6.12E-02 |
| Proteobacteria | Rhodobacteraceae    | 3358     | <i>Rhodovulum</i> sp.                 | 23.75                    | 3.25E-02 | 1.25E-01 |
| Actinobacteria | Microbacteriaceae   | 861      | <i>Agromyces ramosus</i>              | 17.39                    | 1.54E-02 | 9.81E-02 |
| Actinobacteria | Nocardiaceae        | 1166     | <i>Rhodococcus equi</i>               | 12.70                    | 3.73E-02 | 1.38E-01 |
| Proteobacteria | Sphingomonadaceae   | 8332     | Drinking water simulator clone        | 11.70                    | 2.21E-03 | 5.94E-02 |

**Table S2. Taxa significantly enriched in *L. johnsonii*-supplemented or control animals**

| Phylum                                                     | Family               | Taxon ID | Representative species             | * $\Delta$ FI | P value | q value |
|------------------------------------------------------------|----------------------|----------|------------------------------------|---------------|---------|---------|
| Taxa enriched in <i>L. johnsonii</i> -supplemented animals |                      |          |                                    |               |         |         |
| Bacteroidetes                                              | Rikenellaceae        | 8246     | Rumen clone F23-G06                | 3,708.6       | 0.018   | 0.118   |
| Bacteroidetes                                              | Rikenellaceae        | 8028     | Cow rumen clone                    | 2,369.6       | 0.031   | 0.151   |
| Proteobacteria                                             | Hyphomicrobiaceae    | 7336     | Candidatus <i>Devosia euplotis</i> | 2,273.7       | 0.001   | 0.034   |
| Caldiserica                                                | 062DZ04              | 9683     | Temporal variation Spirochetal     | 2,213.7       | 0.01    | 0.095   |
| Firmicutes                                                 | Ruminococcaceae      | 9995     | <i>Ruminococcus</i> sp. str.       | 1,504.5       | 0.001   | 0.034   |
| Bacteroidetes                                              | Rikenellaceae        | 8923     | Temperate estuarine mud            | 1,470.8       | 0.005   | 0.067   |
| Bacteroidetes                                              | Flammeovirgaceae     | 1914     | Marine isolate str.                | 1,415.4       | 0.001   | 0.034   |
| Bacteroidetes                                              | Flammeovirgaceae     | 2574     | Marine sediment clone              | 1,398         | 0.005   | 0.067   |
| Firmicutes                                                 | Desulfotobacteraceae | 4420     | Endosymbiont <i>Trimyema</i>       | 1,092         | 0.021   | 0.123   |
| Spirochaetes                                               | Spirochaetaceae      | 6229     | <i>Spirochaeta taiwanensis</i>     | 958.5         | 0.012   | 0.097   |
| Cyanobacteria                                              | Nostocaceae          | 7732     | <i>Anabaena spiroides</i>          | 837.1         | 0.008   | 0.083   |
| Taxa enriched in control animals                           |                      |          |                                    |               |         |         |
| Firmicutes                                                 | Lachnospiraceae      | 9843     | Rumen clone F24-A02                | -2,122.5      | 0.018   | 0.118   |
| Firmicutes                                                 | Lachnospiraceae      | 10861    | Rumen clone F23-B10                | -1,830.8      | 0.001   | 0.034   |
| Firmicutes                                                 | Ruminococcaceae      | 11017    | <i>Bacteroides capillosus</i> str. | -1,402.5      | 0.013   | 0.102   |
| Chloroflexi                                                | Unclassified         | 1660     | Uranium mining waste               | -1,392.0      | 0.004   | 0.064   |
| Cyanobacteria                                              | Nostocaceae          | 8002     | <i>Anabaena flos-aquae</i>         | -1,242.5      | 0.021   | 0.123   |
| Planctomycetes                                             | Unclassified         | 431      | Cultivating Sargasso Sea           | -1,017.2      | 0.046   | 0.201   |
| Firmicutes                                                 | Lachnospiraceae      | 10892    | <i>Clostridium</i> sp. str.        | -1,000.6      | 0.040   | 0.181   |
| LCP-89                                                     | Unclassified         | 3812     | Saltmarsh clone LCP-89             | -920.8        | 0.007   | 0.083   |
| Proteobacteria                                             | Hyphomicrobiaceae    | 9768     | <i>Hyphomicrobium aestuarii</i>    | -741.5        | 0.026   | 0.134   |
| Proteobacteria                                             | Rhodocyclaceae       | 5223     | <i>Thauera chlorobenzoica</i>      | -557.8        | 0.024   | 0.127   |

\*Taxon mean fluorescent intensity differential between treatment groups (*L. johnsonii*-supplemented animals minus unsupplemented control mice).
